# Supplementary material for: Precursor engineering for high-quality Cs2AgBiBr6 films toward efficient lead-free double perovskite solar cells
Source: Royal Society of Chemistry journal article supplement (doi:10.1039/d1tc01786a), 2021-01-01
Supplement: d1tc01786a1.pdf [file d1tc01786a1.pdf]

## Supplementary Information

### **Precursor Engineering for High-quality Cs<sub>2</sub>AgBiBr<sub>6</sub> Films toward Efficient Lead-Free Double Perovskite Solar Cells**

*Ping Hou<sup>a,b</sup>, Wenxiang Yang<sup>c,b</sup>, Ning Wan<sup>d,b</sup>, Zhi Fang<sup>b</sup>, Jinju Zheng<sup>b</sup>, Minghui Shang<sup>b</sup>,  
Dingfa Fu<sup>a,\*</sup>, Zuobao Yang<sup>b,\*</sup>, Weiyu Yang<sup>b</sup>*

<sup>a</sup> College of Materials Science and Engineering, Hunan University, Changsha, 410082, P.R. China.

<sup>b</sup> Institute of Materials, Ningbo University of Technology, Ningbo City, 315211, P.R. China.

<sup>c</sup> College of Engineering and Design, Hunan Normal University, Changsha, 410081, P.R.China.

<sup>d</sup> College of Physics, Jilin University, Jilin, 130012, P.R.China

**Corresponding author E-mails:** [hunu\\_fudingfa@163.com](mailto:hunu_fudingfa@163.com) (D. Fu)

[hokepoly@nbut.edu.cn](mailto:hokepoly@nbut.edu.cn) (Z. Yang)

**Tel:** +86-574-87080966

**Fax:** +86-574-87080966

---

\* Corresponding authors. E-mails: [hunu\\_fudingfa@163.com](mailto:hunu_fudingfa@163.com) (D. Fu) [hokepoly@nbut.edu.cn](mailto:hokepoly@nbut.edu.cn) (Z. Yang)  
Tel: 86-574-87080966, Fax: 86-574-87080966.

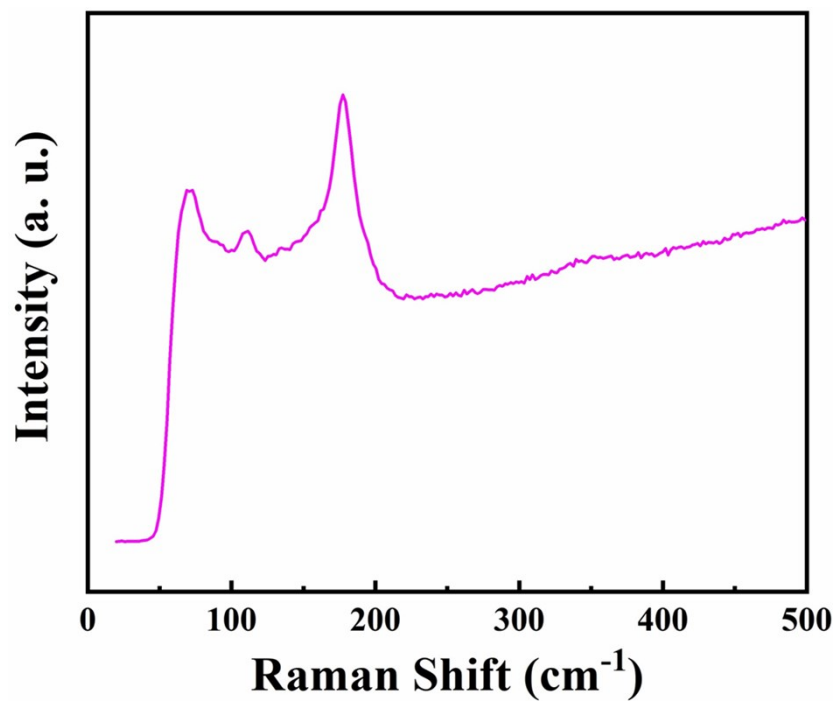

**Fig. S1** Raman spectrum of the optimized Cs<sub>2</sub>AgBiBr<sub>6</sub> thin films with BiBr<sub>3</sub>(DMSO)<sub>2</sub>adducts.

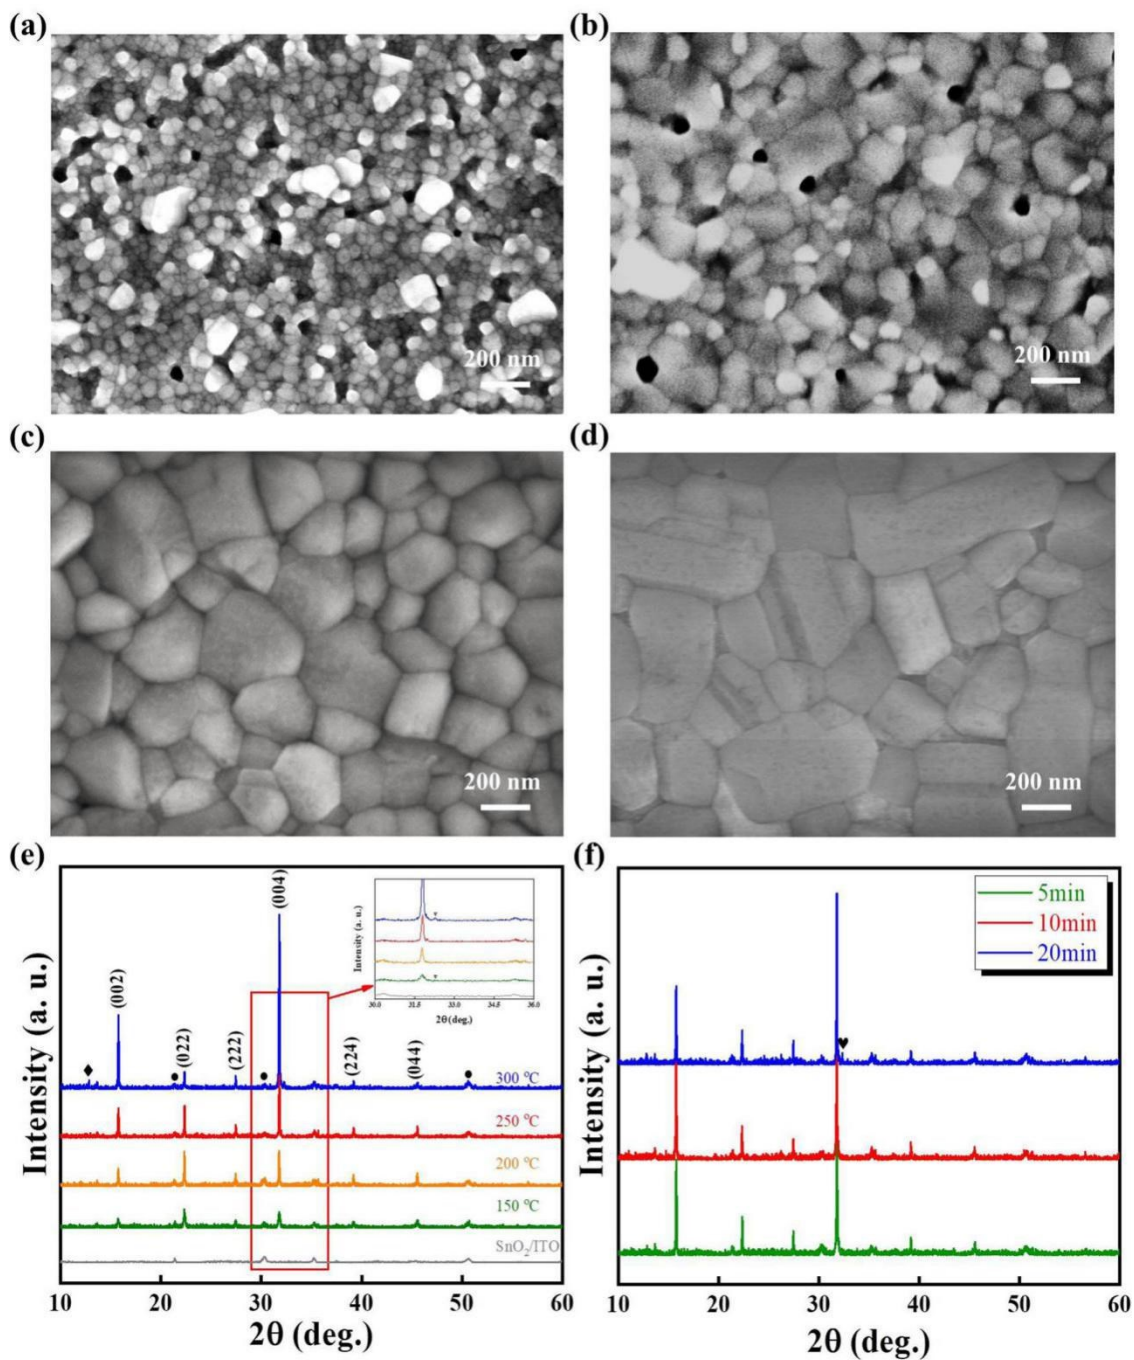

**Fig. S2** (a)-(d) SEM images of freshly-coated Cs<sub>2</sub>AgBiBr<sub>6</sub> films prepared via BiBr<sub>3</sub>(DMSO)<sub>2</sub> under different annealing temperatures. (a) 150 °C (b) 200 °C (c) 250 °C and (d) 300 °C. and XRD spectra of Cs<sub>2</sub>AgBiBr<sub>6</sub> films prepared (e) under different annealing temperature and (f) different annealing time. The asterisk (\*) indicates the position of reflections from the substrates.

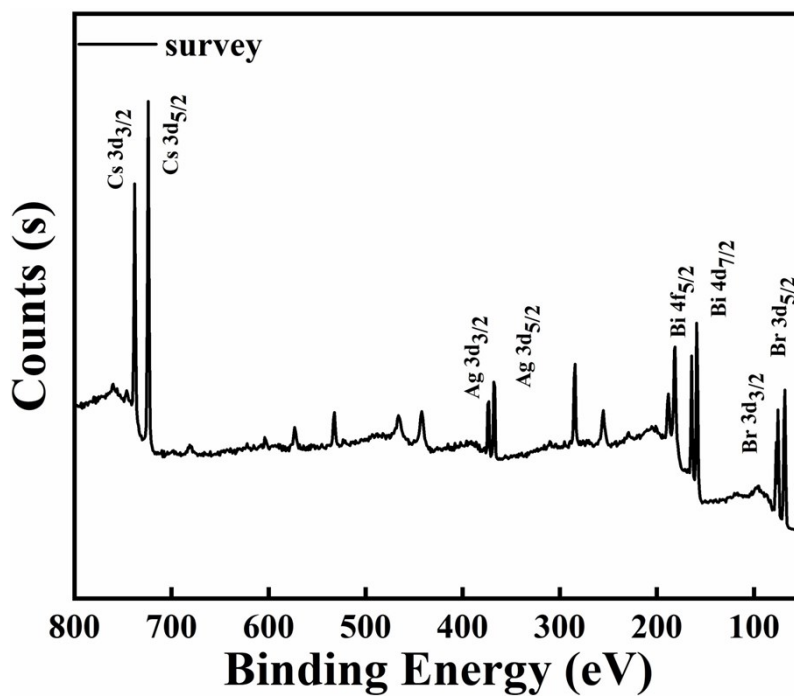

Fig. S3 XPS survey spectra of Cs<sub>2</sub>AgBiBr<sub>6</sub> film with DMSO adduct.
